# Supplementary material
Source: publisher figshare collection journal article supplement (https://sage.figshare.com/ndownloader/files/21327753)
Supplement: Supplementary file 1 [file 21327753]

## **Supplemental Content Legend**

1. **Supplemental Figure 1.** Still images taken during nasoendoscopic examination of the velopharyngeal port at rest (1a, left) and at maximal closure during phonation (1b, right), showing a wide and deep pharynx and a large residual velopharyngeal gap.
2. **Supplemental Figure 2.** The surgical technique employed in this study was a wide superiorly based posterior pharyngeal flap inset into the pocket of the posterior border of the soft palate.
